# Supplementary material for: Genomic Profiling Reveals the Potential Role of TCL1A and MDR1 Deficiency in Chemotherapy-Induced Cardiotoxicity
Source: PubMed Central journal article supplement — Int J Biol Sci. 2013 Apr 22;9(4):350–60. doi: 10.7150/ijbs.6058 (PMC3638290; doi:10.7150/ijbs.6058), 2013-04-22
Supplement: ijbsv09p0350s1.pdf [file ijbsv09p0350s1.pdf]

## Supplementary Figures

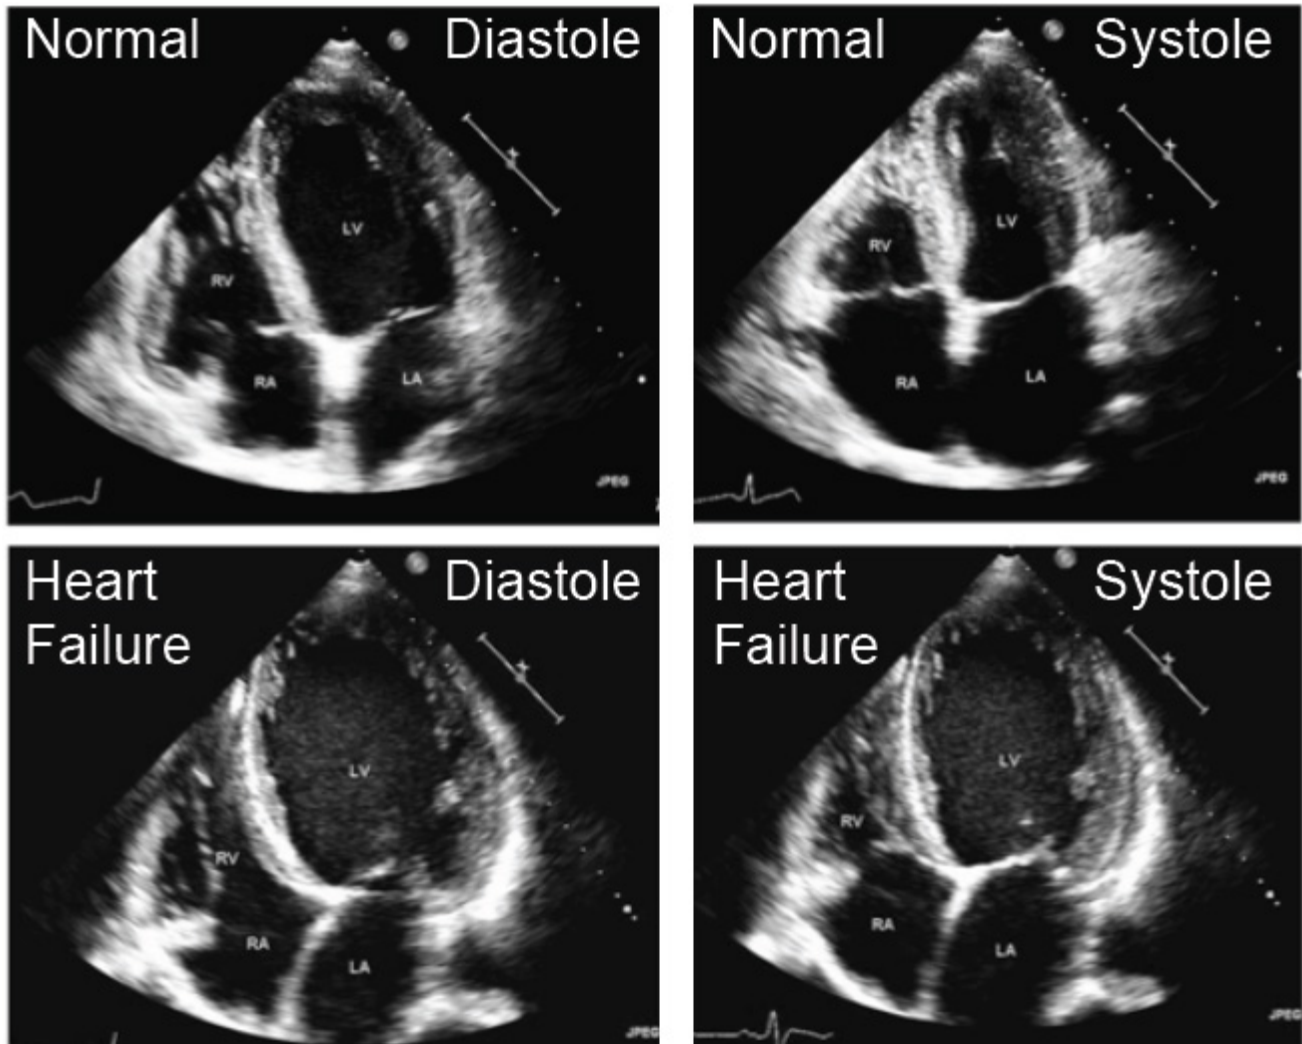

**Supplementary Figure 1. Echocardiography of doxorubicin-induced cardiomyopathy.** A representative echocardiogram from a normal subject (upper panels) at systole (right) and diastole (left) compared to a woman with doxorubicin-induced cardiomyopathy (lower panels). Note the marked enlargement of the left ventricle (arrow). The simultaneous ECG tracing is shown in the lower left of each panel.
